# Supplementary material for: Stable transgenerational epigenetic inheritance requires a DNA methylation-sensing circuit
Source: PubMed Central journal article supplement (PMC5730562; doi:10.1038/s41467-017-02219-3), 2017-12-14
Supplement: 41467_2017_2219_MOESM1_ESM.pdf [file 41467_2017_2219_MOESM1_ESM.pdf]

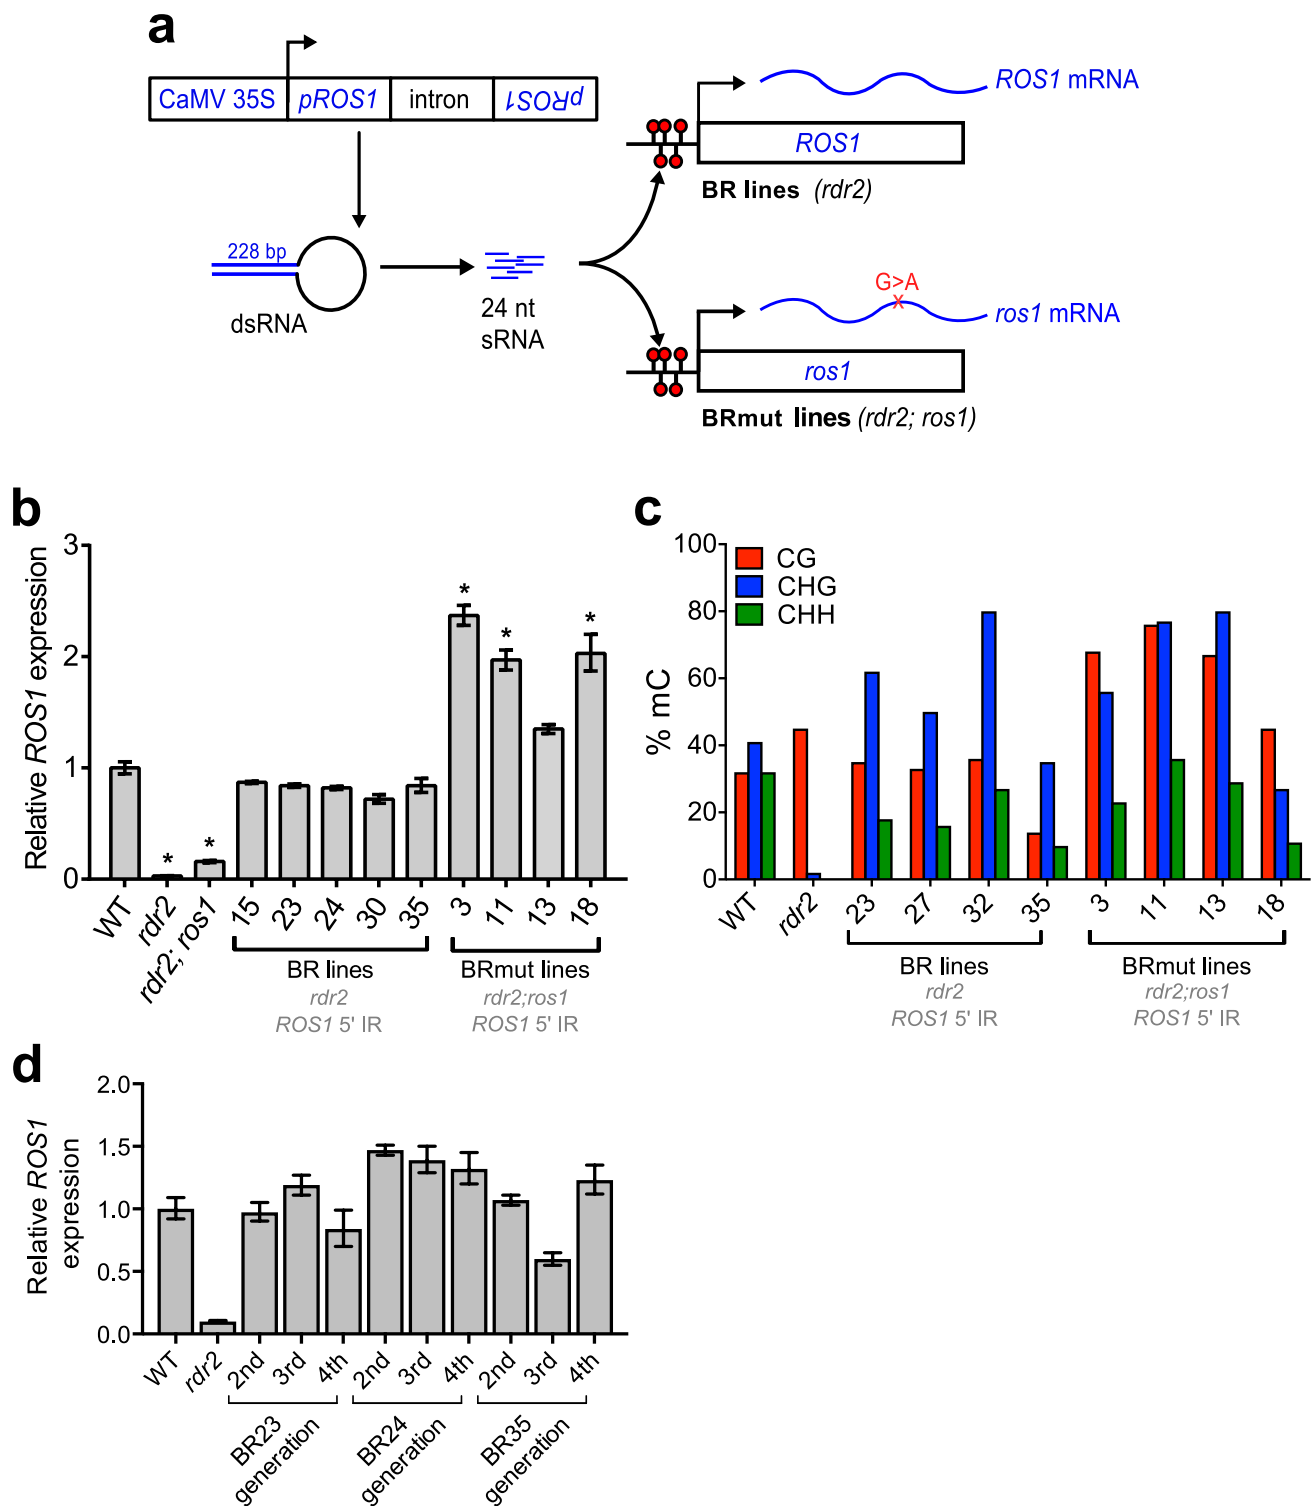

**Supplementary Figure 1: Strategy for uncoupling *ROS1* expression from global DNA methylation activity.** (a) Schematic depicting the inverted repeat (*ROS1* 5' IR) transgene that restores RNA-directed DNA methylation 5' of *ROS1*. The inverted repeat transgene was constitutively expressed in *rdr2* mutants to generate broken rheostat (BR) lines that restore *ROS1* expression to WT levels. The transgene was expressed in *rdr2; ros1* mutants to generate control broken rheostat mutated (BRmut) lines. The mutant *ros1* allele has a missense mutation in the catalytic domain. (b) RT-qPCR measurement of *ROS1* transcript abundance in individual plants from second generation BR lines and control lines. Error bars represent standard deviation of three technical replicates. \*  $p < 0.001$  in comparison to WT (two-tailed t-test). (c) Bisulfite PCR sequencing measurement of DNA methylation 5' of *ROS1* in individual second generation plants from independent BR lines and BRmut lines. Between 12-20 clones were sequenced for each sample. (d) RT-qPCR measurement of *ROS1* transcript abundance in second, third and fourth generation plants from 3 independent BR lines. Error bars represent standard deviation of three technical replicates.

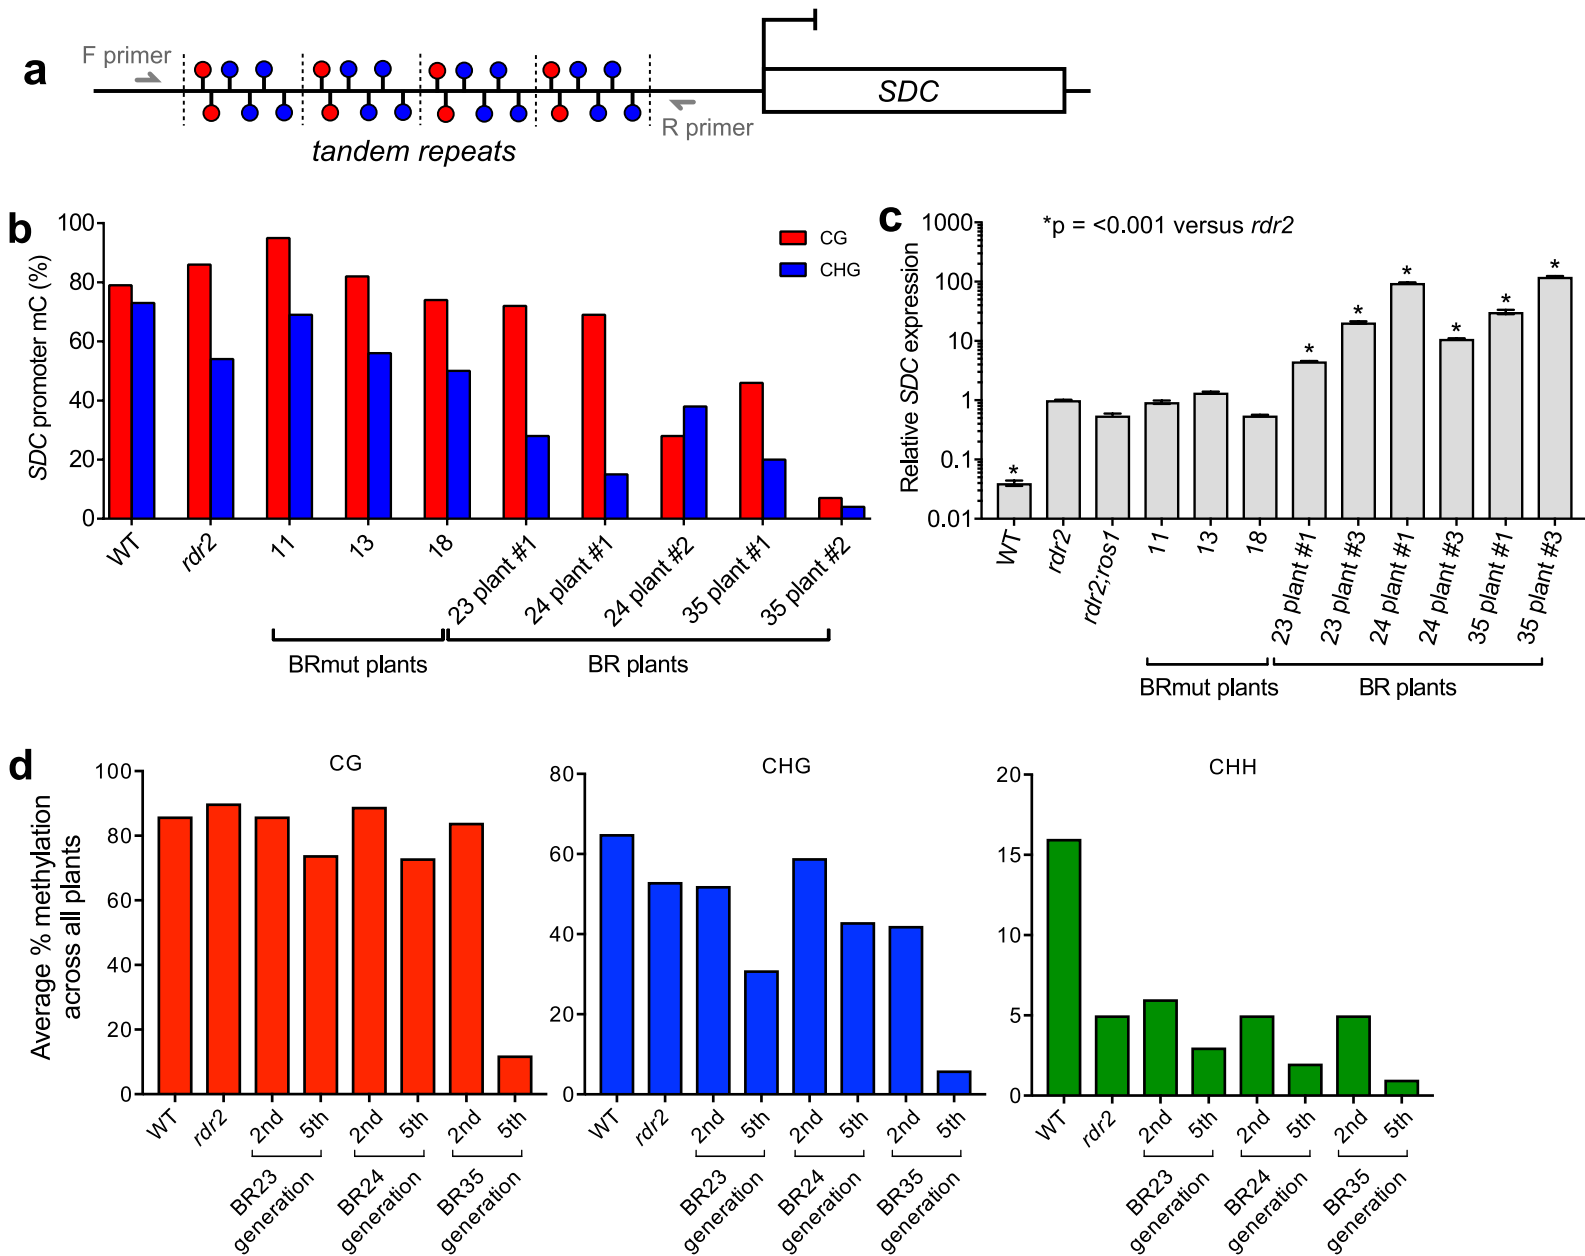

**Supplementary Figure 2: *SDC* is hypomethylated and expressed in individual second generation broken rheostat plants.** (a) Schematic showing methylated *SDC* locus and primers designed for bisulfite PCR. (b) Bisulfite PCR measurement of DNA methylation 5' of *SDC* in individual second generation broken rheostat (BR) plants and BRmut plants. At least 24 clones were sequenced for each sample. (c) RT-qPCR measurement of relative *SDC* expression in individual second generation BR plants and control plants. Error bars represent standard deviation of three technical replicates. \*  $p = <0.001$  in comparison to *rdr2* (two-tailed t-test) (d) Bisulfite PCR measurement of average methylation 5' of *SDC* in DNA pooled from ~20 plants from the second and fifth generation of BR lines. Between 24-37 clones were sequenced for each sample. The same data is also represented in Fig. 1e.

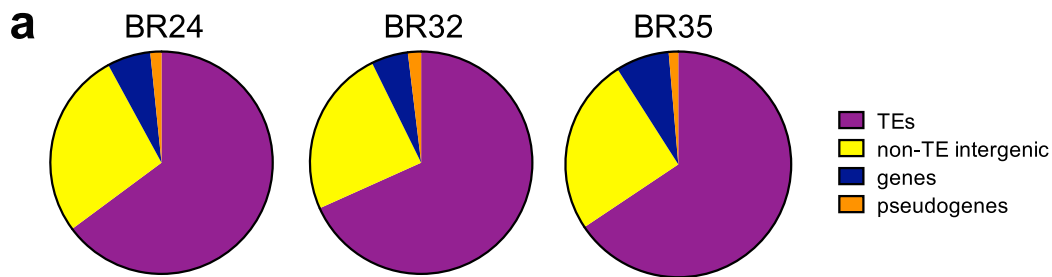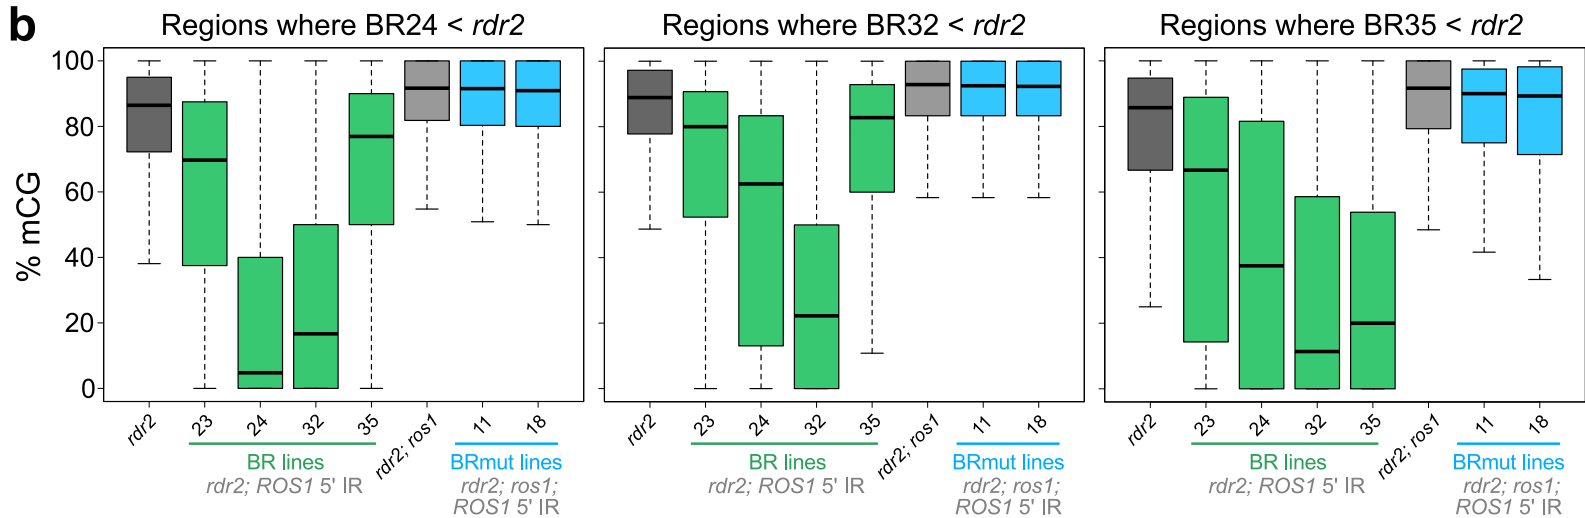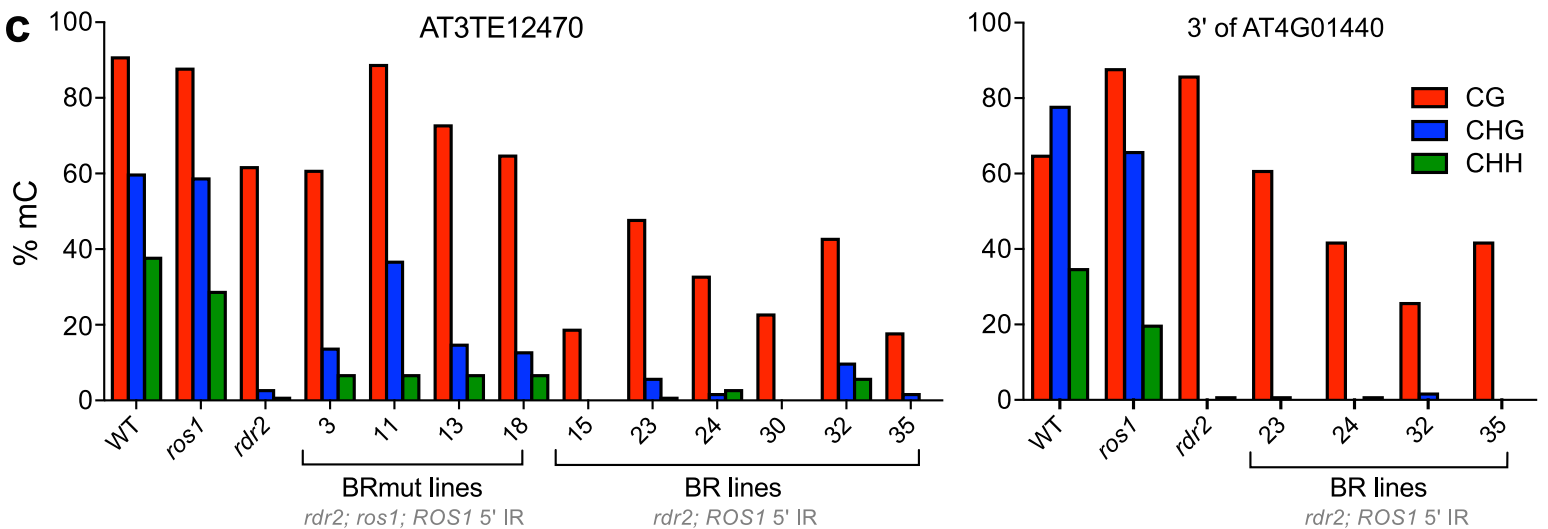

**Supplementary Figure 3: Independent broken rheostat lines lose methylation at similar loci.** (a) Pie charts denoting the proportion of significantly hypomethylated loci (in any sequence context, compared to *rdr2*) that coincide with genes, pseudogenes, transposable elements (TEs) and non-TE intergenic sequences. (b) Box and whisker plot of the methylation levels of individual CGs at hypomethylated loci from each BR line. Independent BR lines exhibit reduced methylation compared to *rdr2* at the loci reduced in other lines. (c) Bisulfite PCR validation of DNA methylation levels at two loci identified by whole genome bisulfite sequencing to lose DNA methylation in multiple lines. At least 24 clones were sequenced for each sample.

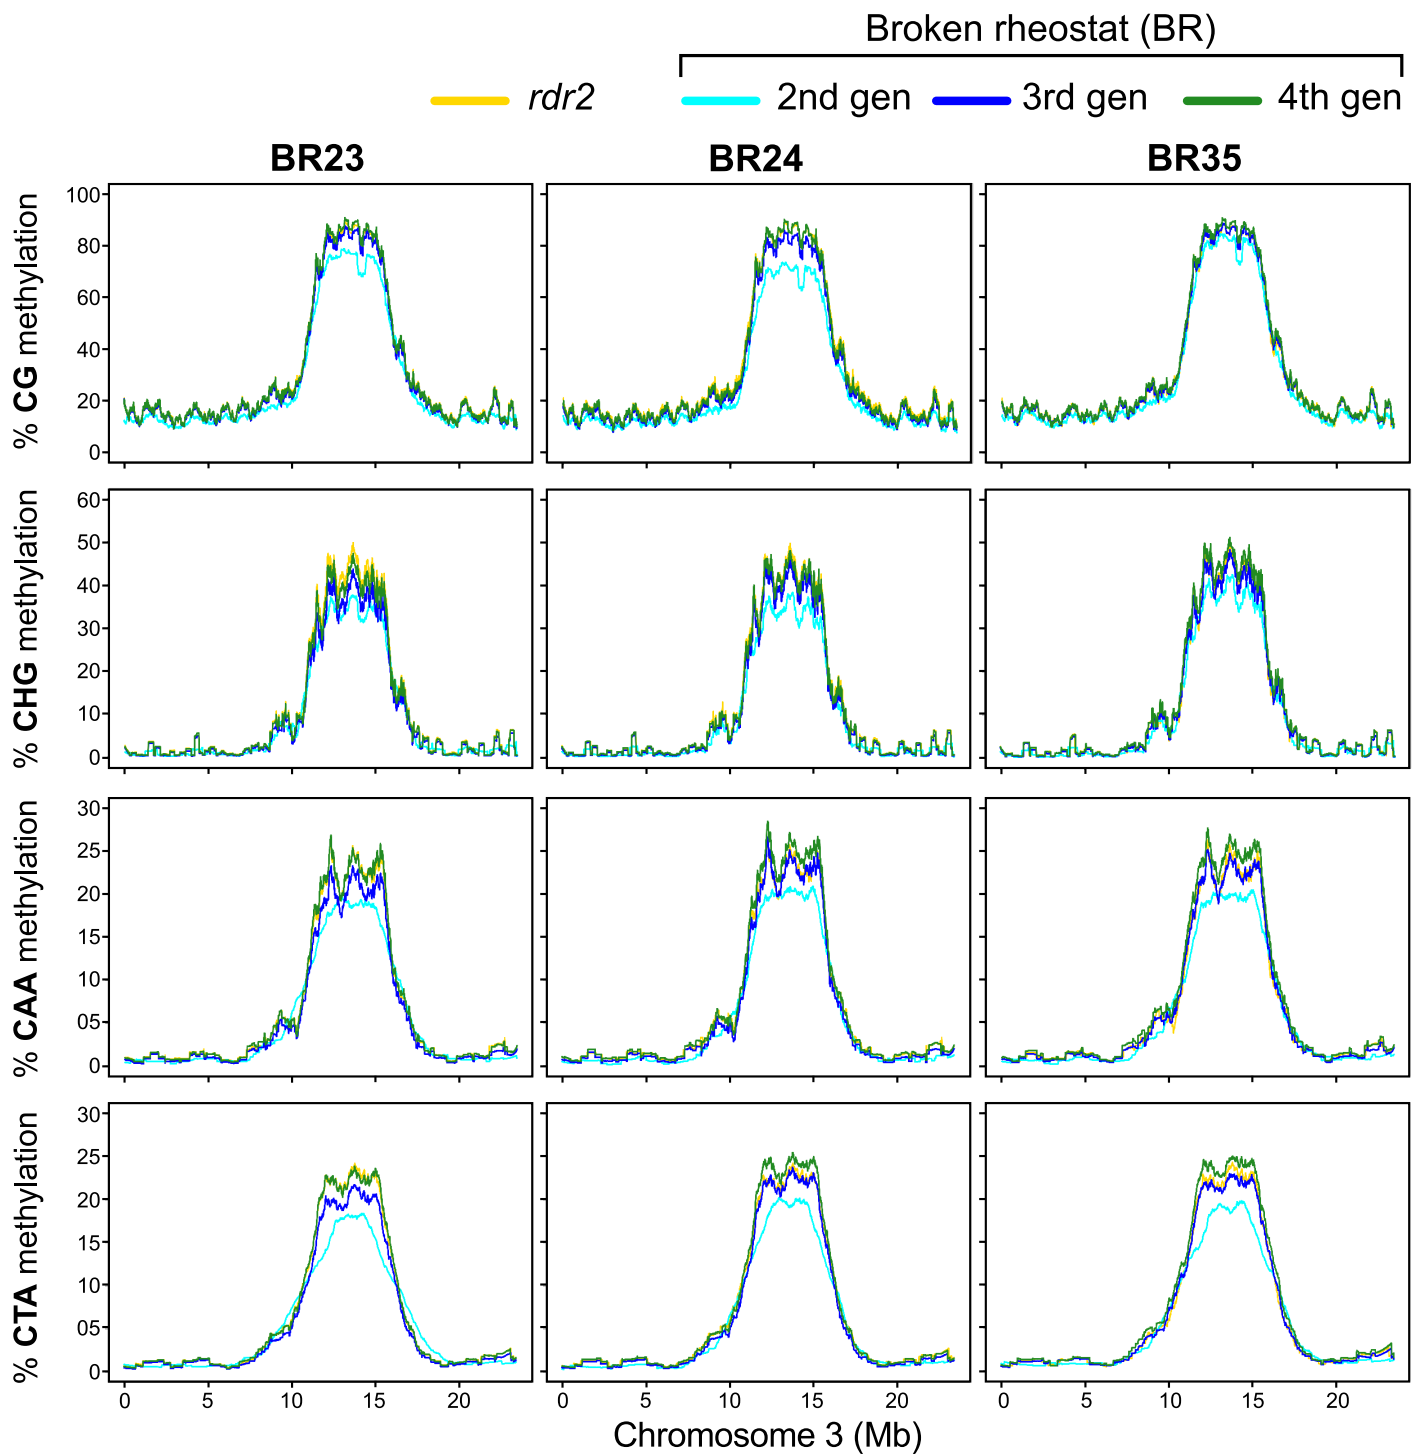

**Supplementary Figure 4: Broken rheostat lines gradually regain lost methylation in all sequence contexts.** Moving average plots of DNA methylation across chromosome 3 in multiple sequence contexts. Moving average values were calculated across 10 kb windows.

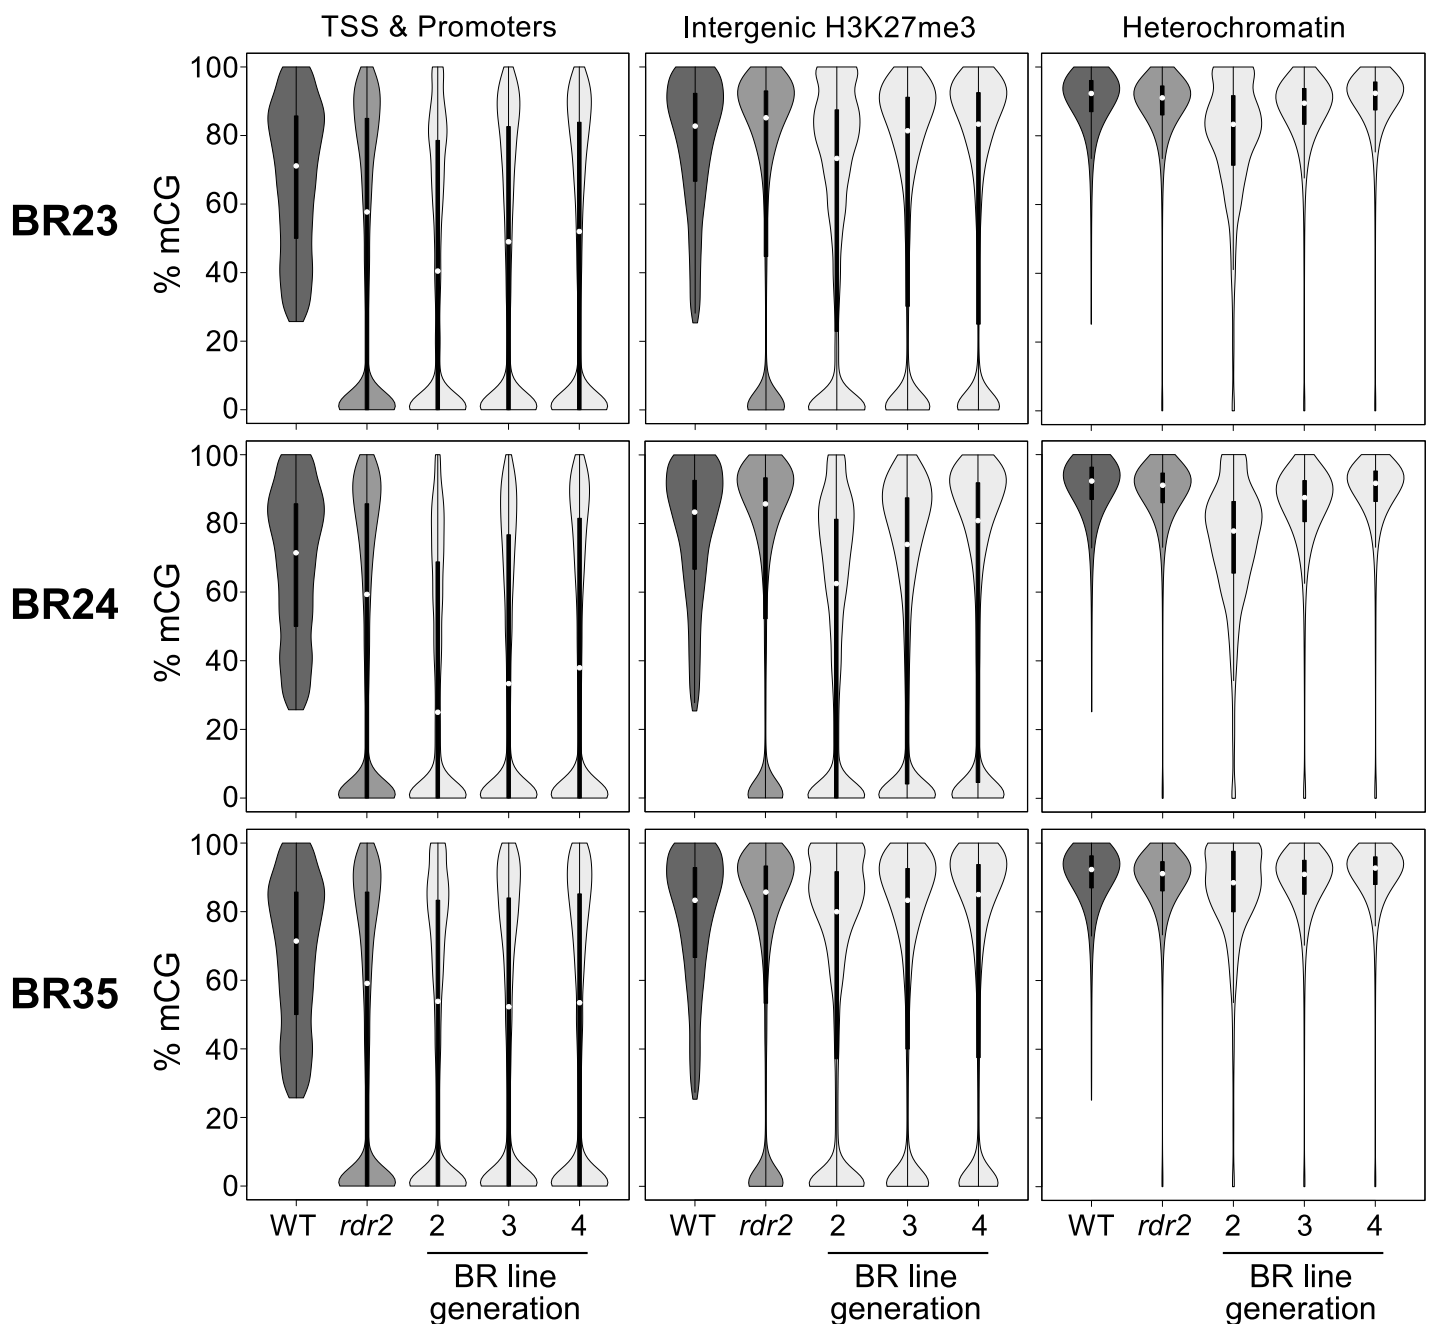

**Supplementary Figure 5: Different chromatin states show different dynamic methylation changes over multiple generations.** Violin plots of CG methylation levels at different chromatin states. White circles denote median values, black bars denote interquartile ranges. Data is shown for CGs with  $\geq 25\%$  methylation in WT. TSS & promoters represents chromatin states 1 and 2 identified by Sequeira-Mendes et al<sup>1</sup>. Intergenic H3K27me3 represents chromatin states 4 and 5, heterochromatin represents states 8 and 9.

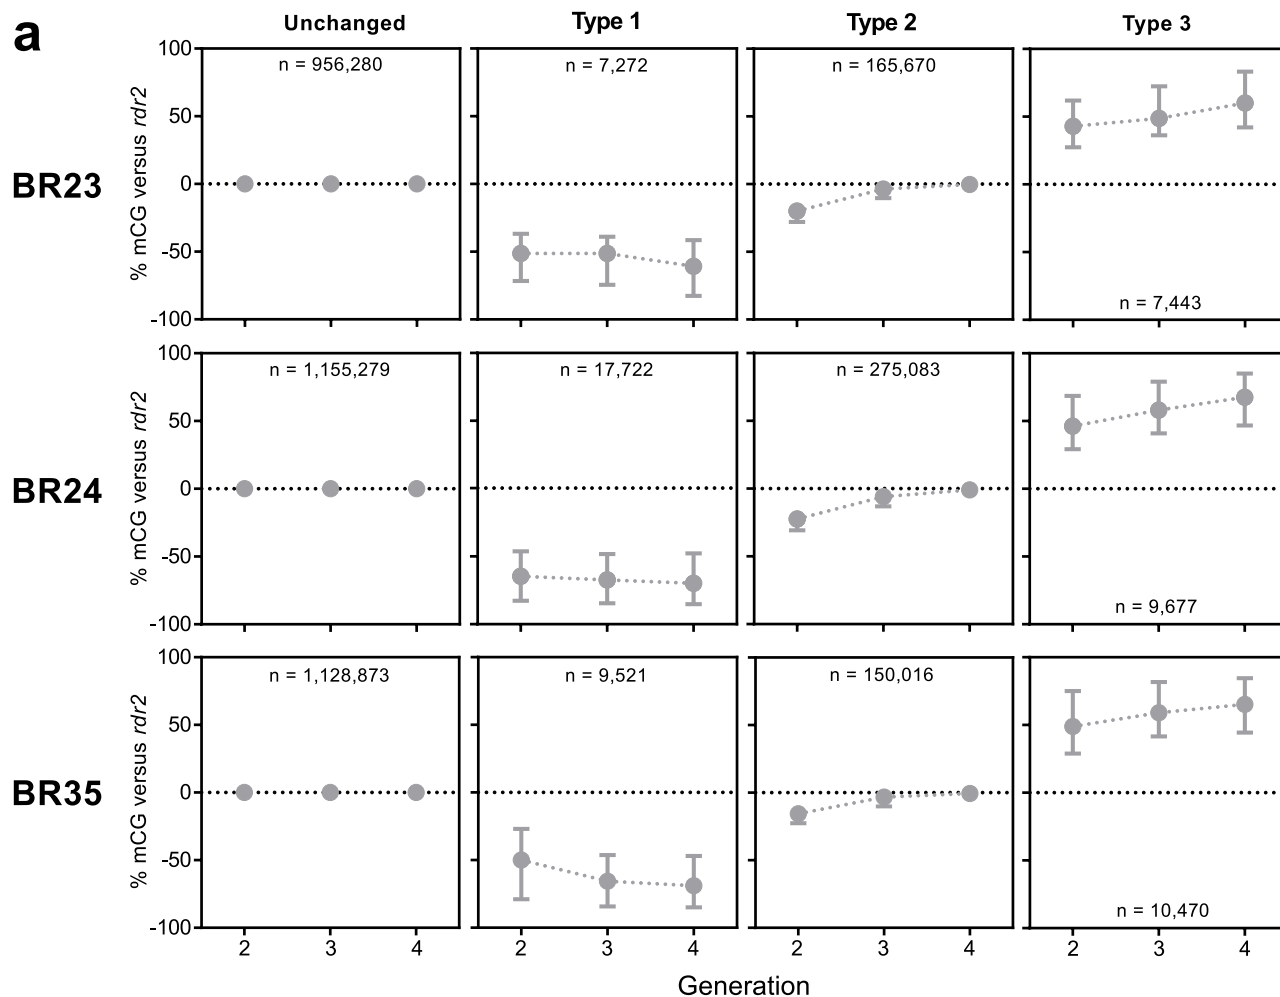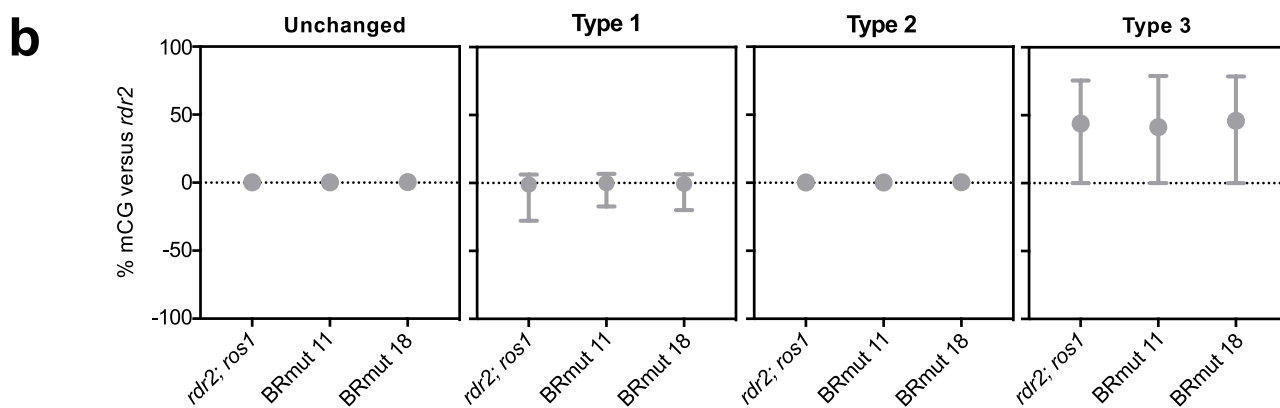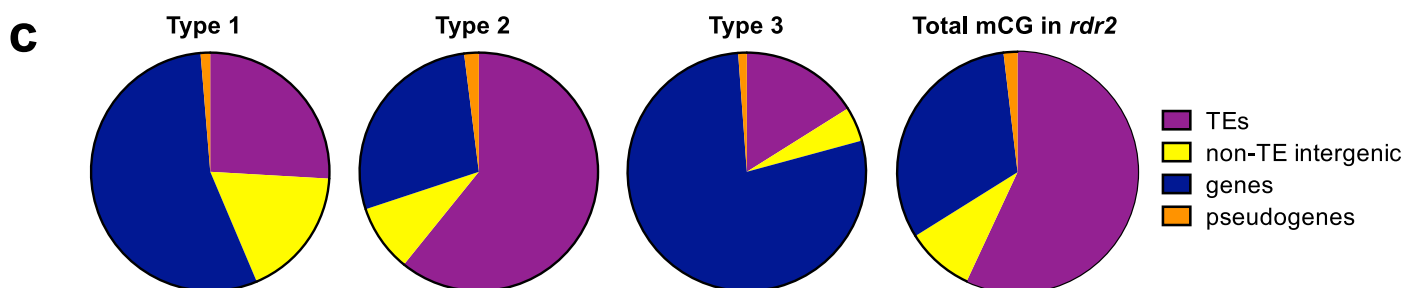

**Supplementary Figure 6: K-means clustering of DNA methylation values for individual CGs over multiple generations.** (a) K-means clustering ( $k=4$ ) was performed on differential DNA methylation values (compared to *rdr2*) for individual CGs across three generations in three independent broken rheostat (BR) lines. Only cytosines covered by 5 or more reads in all samples were considered. Circles represent median values and error bars represent the interquartile range.  $n$  represents the number of CGs in each cluster. (b) The methylation level of Type 1, Type 2 and Type 3 CGs in *rdr2; ros1* mutants and BRmut lines. Circles represent median values and error bars represent the interquartile range. (c) Pie charts denoting the proportion of Type1, Type 2 and Type 3 CGs that are located within different genomic features.

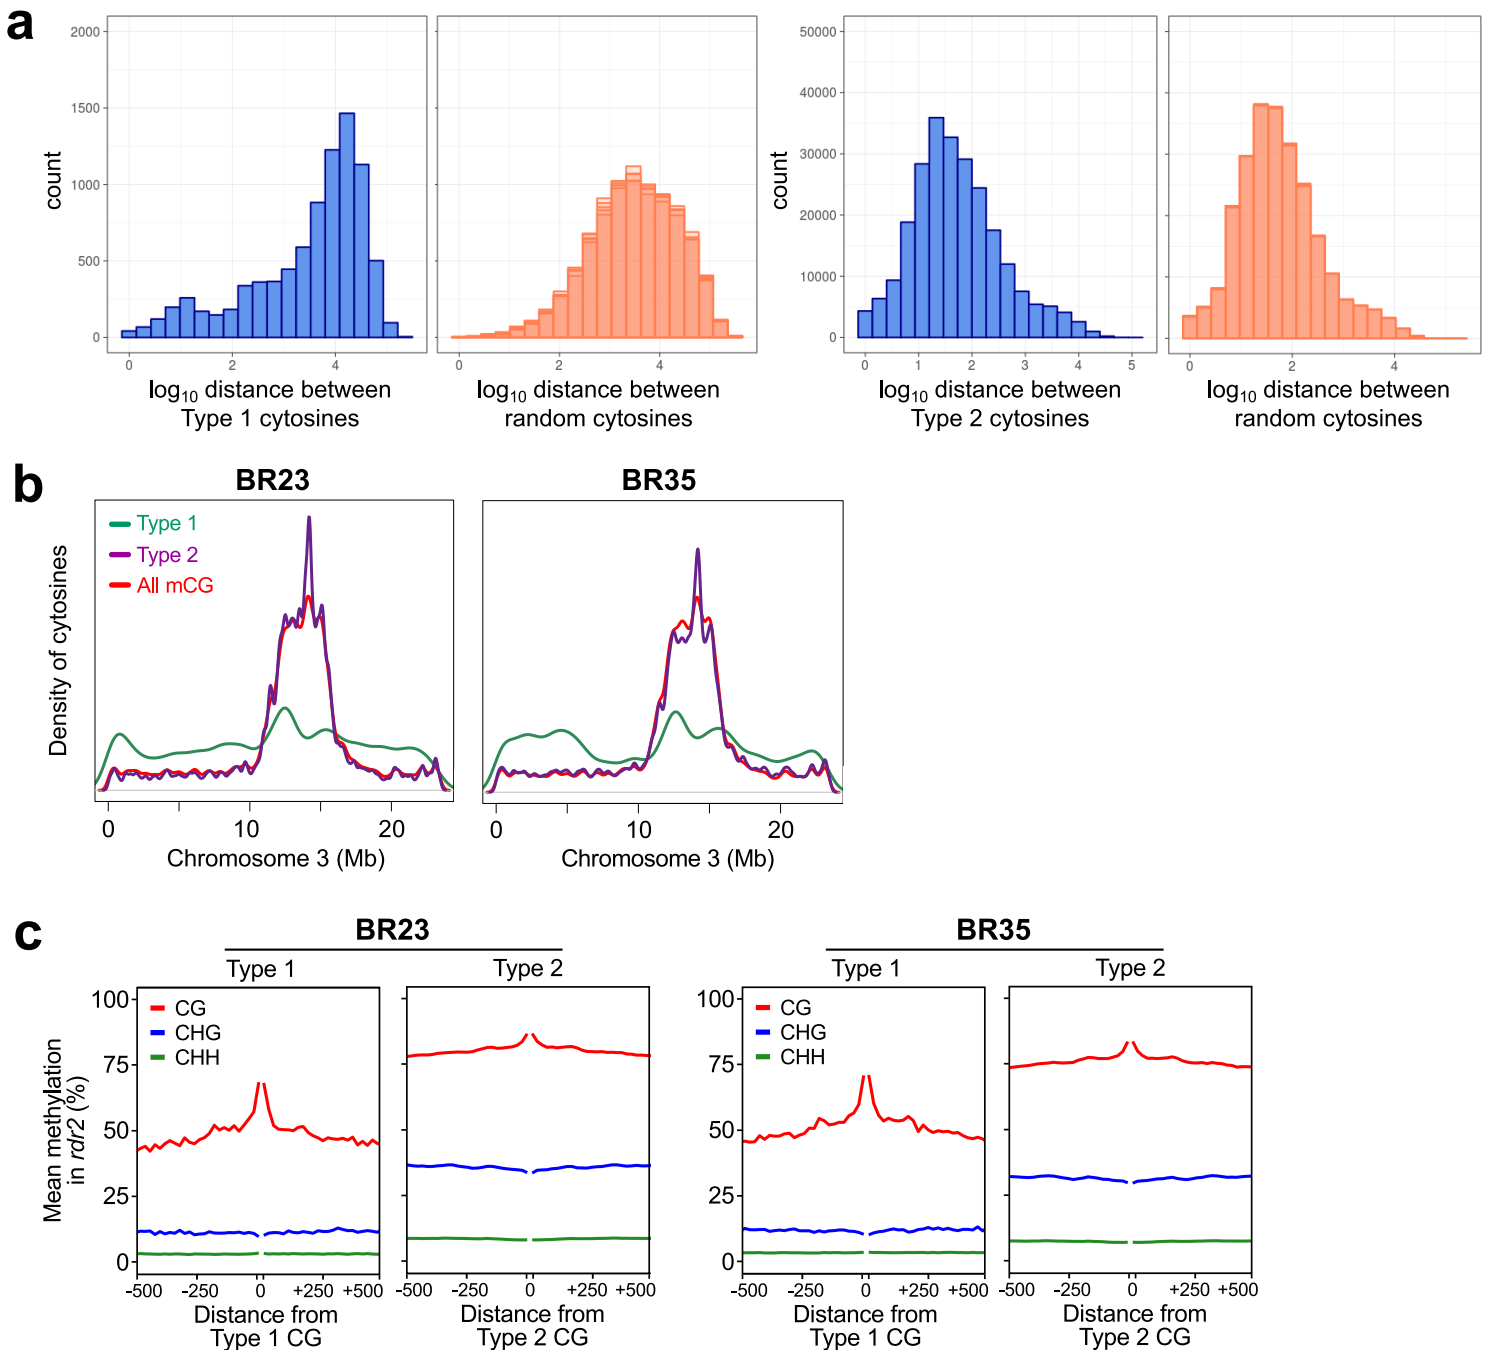

**Supplementary Figure 7: Type 1 cytosines are clustered at discrete loci in euchromatic arms.**

(a) The distance between Type 1 or Type 2 CGs to other CGs in the same cluster (in blue) compared to five randomly selected groups of methylated CGs of the same number (in orange). (b) Kernel density plots showing the distribution of Type 1 and Type 2 cytosines on chromosome 3 compared to all methylated CGs in *rdr2* for BR lines 23 and 35. (c) Average methylation levels of the *rdr2* mutant in sequences proximal to BR23 or BR35 Type 1 and Type 2 CGs. Methylation levels are calculated for sequences up to 500 bp upstream and downstream.

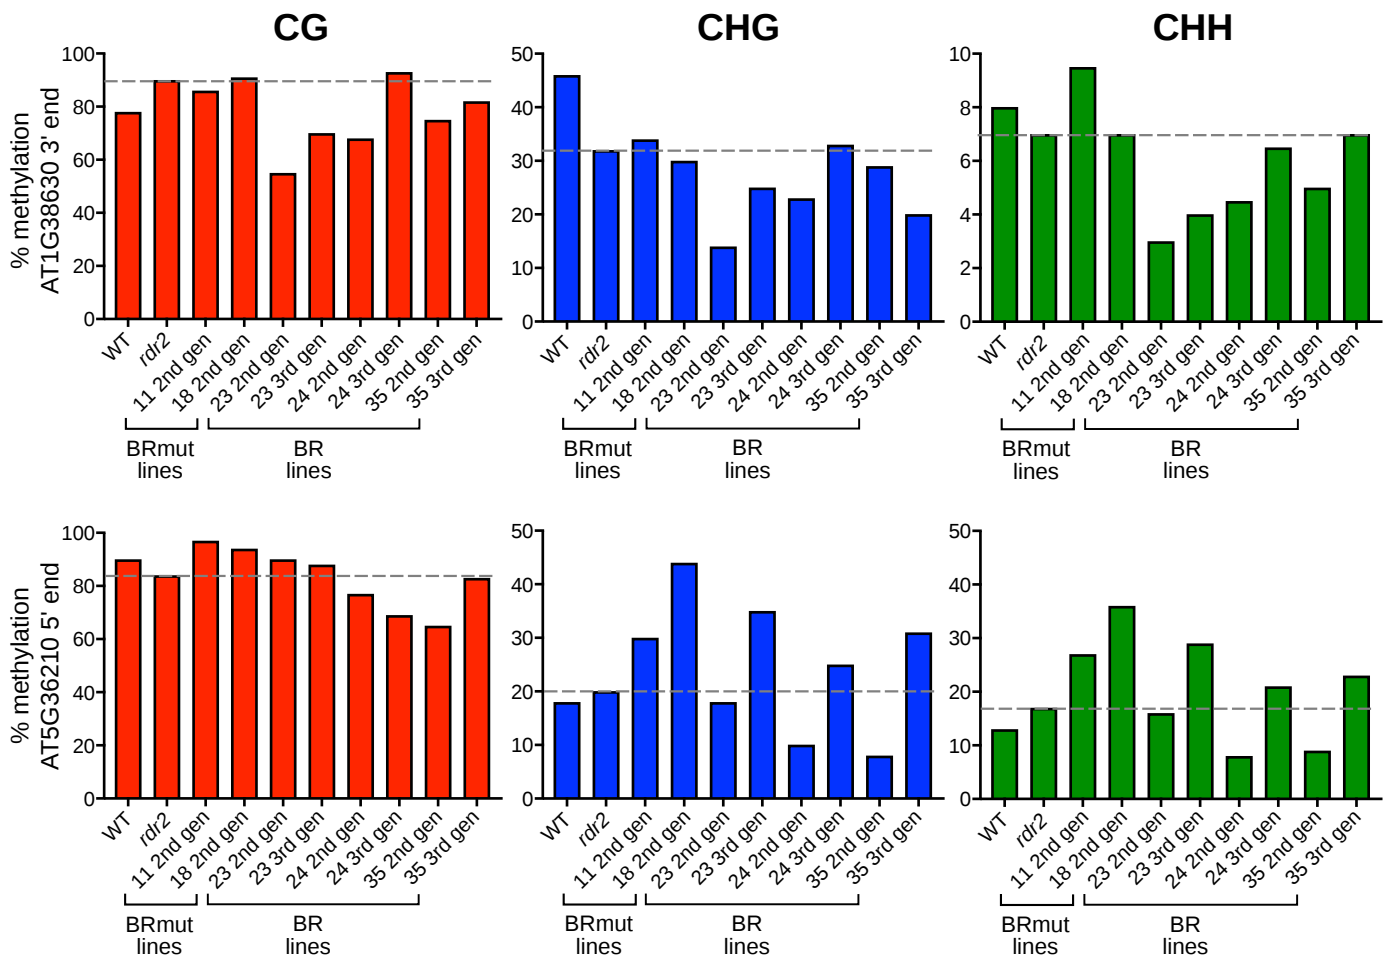

**Supplementary Figure 8: Bisulfite PCR validation of Type 2 cytosines in BR lines.** Bisulfite PCR measurement of DNA methylation levels at two loci that regained methylation from the second to third generation in the whole genome bisulfite sequencing data. Bisulfite PCR was performed on DNA from siblings of the individuals used for whole genome bisulfite sequencing. The third generation plants used in this experiment are therefore not progeny of the second generation plants. At least 16 independent clones were sequenced for each sample.



**Supplementary Table 1: Statistics on whole genome bisulfite sequencing libraries**

| Sample              | Tissue                   | Leaf curling phenotype score | cycles     | Total reads | Uniquely mapping reads | % Reads uniquely mapping | Unique reads after deduplication | % non-duplicated reads | Conversion rate | mC in CpG context: | mC in CHG context: | mC in CHH context: |
|---------------------|--------------------------|------------------------------|------------|-------------|------------------------|--------------------------|----------------------------------|------------------------|-----------------|--------------------|--------------------|--------------------|
| Col-0               | 3-week old rosette       | 0                            | 100 PE     | 35,788,973  | 17,190,627             | 48.03                    | 10,793,901                       | 62.79                  | 98.3%           | 39.2%              | 15.9%              | 4.5%               |
| <i>rdr2</i>         | 3-week old rosette       | 1                            | 100 PE     | 84,179,767  | 46,232,091             | 54.92                    | 21,754,127                       | 47.05                  | 96.7%           | 34.4%              | 12.0%              | 3.1%               |
| <i>ros1</i>         | 3-week old rosette       | 1                            | 100 PE     | 41,061,019  | 24,046,287             | 58.56                    | 13,447,384                       | 55.92                  | 98.3%           | 38.6%              | 15.1%              | 4.0%               |
| <i>rdr2; ros1</i>   | 3-week old rosette       | 1                            | 100 PE     | 78,808,019  | 35,277,213             | 44.76                    | 20,122,678                       | 57.04                  | 98.7%           | 35.8%              | 13.0%              | 3.3%               |
| BRmut 11*           | 3-week old rosette       | 1                            | 100 PE     | 99,485,220  | 39,531,759             | 39.74                    | 21,857,722                       | 55.29                  | 98.7%           | 35.4%              | 12.6%              | 3.1%               |
| BRmut 18*           | 3-week old rosette       | 0                            | 100 PE     | 75,570,327  | 34,869,357             | 46.14                    | 19,629,954                       | 56.30                  | 98.4%           | 36.4%              | 13.4%              | 3.4%               |
| BR23*               | 3-week old rosette       | 2                            | 100 PE     | 55,017,230  | 30,538,823             | 55.51                    | 13,665,002                       | 44.75                  | 97.5%           | 36.7%              | 13.6%              | 3.7%               |
| BR24*               | 3-week old rosette       | 3                            | 100 PE     | 139,230,332 | 64,455,143             | 46.29                    | 31,668,205                       | 49.13                  | 99.4%           | 31.3%              | 11.3%              | 3.0%               |
| BR32*               | 3-week old rosette       | 4                            | 100 PE     | 130,371,424 | 61,539,987             | 47.20                    | 30,991,983                       | 50.36                  | 98.8%           | 29.6%              | 12.0%              | 3.1%               |
| BR35*               | 3-week old rosette       | 5                            | 100 PE     | 64,075,533  | 35,244,745             | 55.00                    | 16,784,762                       | 47.62                  | 99.0%           | 36.4%              | 14.2%              | 3.4%               |
| BR23 T <sub>2</sub> | 3-week old mature leaves | 1                            | 40/50 PE** | 80,706,122  | 33,580,221             | 41.61                    | 11,698,237                       | 34.84                  | 99.8%           | 28.6%              | 9.1%               | 2.1%               |
| BR23 T <sub>3</sub> | 3-week old mature leaves | 2                            | 75 PE      | 61,223,702  | 31,453,899             | 51.38                    | 20,379,475                       | 64.79                  | 99.6%           | 32.7%              | 9.9%               | 2.5%               |
| BR23 T <sub>4</sub> | 3-week old mature leaves | 2                            | 100 PE     | 78,203,515  | 33,867,703             | 43.31                    | 19,609,294                       | 57.90                  | 99.5%           | 34.2%              | 11.1%              | 3.0%               |
| BR24 T <sub>2</sub> | 3-week old mature leaves | 2                            | 40/50 PE** | 92,583,656  | 43,009,570             | 46.45                    | 17,799,330                       | 41.38                  | 99.9%           | 25.8%              | 8.3%               | 2.1%               |
| BR24 T <sub>3</sub> | 3-week old mature leaves | 3                            | 75 PE      | 63,644,488  | 34,135,287             | 53.63                    | 22,771,920                       | 66.71                  | 99.4%           | 31.2%              | 10.3%              | 2.7%               |
| BR24 T <sub>4</sub> | 3-week old mature leaves | 4                            | 100 PE     | 87,878,709  | 38,831,174             | 44.19                    | 21,448,630                       | 55.24                  | 99.4%           | 33.1%              | 11.3%              | 3.2%               |
| BR35 T <sub>2</sub> | 3-week old mature leaves | 3                            | 40/50 PE** | 98,997,998  | 23,397,455             | 23.63                    | 15,155,753                       | 64.78                  | 98.3%           | 30.9%              | 10.2%              | 2.3%               |
| BR35 T <sub>3</sub> | 3-week old mature leaves | 4                            | 75 PE      | 59,407,918  | 27,285,057             | 45.93                    | 16,956,950                       | 62.15                  | 99.4%           | 34.9%              | 11.9%              | 3.0%               |
| BR35 T <sub>4</sub> | 3-week old mature leaves | 5                            | 100 PE     | 70,681,260  | 27,810,950             | 39.35                    | 15,163,358                       | 54.52                  | 99.5%           | 36.4%              | 13.5%              | 3.5%               |

\*Individual plants from T<sub>4</sub> generation

\*\*Libraries were sequenced twice, once at 40bp paired end and once at 50bp paired end

## Supplementary Table 2: Oligonucleotides used in this study

### qPCR Primers used in this study

|                            |                             |
|----------------------------|-----------------------------|
| <i>ROS1</i> qPCR F         | CAGGCTTGCTTTTGGAAAGGGTACG   |
| <i>ROS1</i> qPCR R         | GTGCTCTCTCACTCTTAACCATAAGCT |
| <i>SDC</i> qPCR F          | GTAGAAGTCAAGTCCTTGGGAGAT    |
| <i>SDC</i> qPCR R          | GAACTCATGAGCCGAAACCGAGA     |
| AT1G58050 qPCR reference F | CCATTCTACTTTTTGGCGGCT       |
| AT1G58050 qPCR reference R | TCAATGGTAACTGATCCACTCTGATG  |

### Bisulfite PCR primers used in this study

|                  |                                |
|------------------|--------------------------------|
| <i>ROS1</i> 5' F | GGAGATTTTGTAGAAAAGAATYATT      |
| <i>ROS1</i> 5' R | TCACTRATRCTTCRTTCTTCTCTT       |
| <i>SDC</i> 5' F  | GAAAAAGTTGGAATGGGYTTGGAGAG     |
| <i>SDC</i> 5' R  | CTCATTCTRCTTTAAACCTCTATACTTA   |
| AT3TE12470 F     | GGAATTTAGGAATTAAGGATTTGTT      |
| AT3TE12470 R     | CAACCCAAATATTATRCCAACCTC       |
| AT4G01440 3' F   | GTATTTTATTGTGTTTTATGTACTTG     |
| AT4G01440 3' R   | TTTATCAATCTATCCTATAARTTTTTTC   |
| AT1G38630 3' F   | GATGTYATGTGTATGATTGAGTTAAGA    |
| AT1G38630 3' R   | CTARTTCTTATACTCAATCATAACAT     |
| AT5G36210 5' F   | TGAGGATAGATYATTGTAATTGTTGGTTT  |
| AT5G36210 5' R   | TCAACAACAACAATRCCATTTATTTACTCA |

## Supplementary Reference

1. Sequeira-Mendes, J. et al. The functional topography of the *Arabidopsis* genome is organized in a reduced number of linear motifs of chromatin states. *Plant Cell* **26**, 2351–2366 (2014).
